# Supplementary material for: Seed Protein of Lentils: Current Status, Progress, and Food Applications
Source: PubMed Central journal article supplement (PMC6769807; doi:10.3390/foods8090391), 2019-09-04
Supplement: foods-08-00391-s001.pdf [file foods-08-00391-s001.pdf]

Supplementary Table S1. List of peptides with bioactive potential encrypted in lentil (*Lens culinaris* Medik.) convicilin (see <http://www.uwm.edu.pl/biochemia>)

| ID   | Activity <sup>1</sup> | Number | Sequence <sup>2</sup> | Location             |
|------|-----------------------|--------|-----------------------|----------------------|
| 3460 | antiamnestic          | 2      | PG                    | [24-25], [45-46]     |
| 3380 | ACE inhibitor         | 1      | RY                    | [126-127]            |
| 3386 | ACE inhibitor         | 1      | KW                    | [72-73]              |
| 3537 | ACE inhibitor         | 1      | PR                    | [21-22]              |
| 3546 | ACE inhibitor         | 1      | VAY                   | [10-12]              |
| 3551 | ACE inhibitor         | 2      | LF                    | [148-149], [157-158] |
| 3563 | ACE inhibitor         | 1      | AY                    | [11-12]              |
| 7582 | ACE inhibitor         | 1      | RP                    | [49-50]              |
| 7583 | ACE inhibitor         | 1      | AF                    | [6-7]                |
| 7585 | ACE inhibitor         | 1      | LA                    | [5-6]                |
| 7586 | ACE inhibitor         | 1      | KR                    | [113-114]            |
| 7587 | ACE inhibitor         | 1      | VP                    | [23-24]              |
| 7589 | ACE inhibitor         | 1      | YA                    | [12-13]              |
| 7593 | ACE inhibitor         | 1      | IF                    | [3-4]                |
| 7596 | ACE inhibitor         | 1      | GI                    | [1-2]                |

|      |               |   |    |                                      |
|------|---------------|---|----|--------------------------------------|
| 7603 | ACE inhibitor | 2 | GR | [30-31], [69-70]                     |
| 7607 | ACE inhibitor | 2 | GS | [18-19], [92-93]                     |
| 7610 | ACE inhibitor | 2 | GQ | [25-26], [46-47]                     |
| 7611 | ACE inhibitor | 2 | GK | [53-54], [131-132]                   |
| 7614 | ACE inhibitor | 2 | HG | [52-53], [96-97]                     |
| 7615 | ACE inhibitor | 2 | GE | [34-35], [88-89]                     |
| 7618 | ACE inhibitor | 1 | SG | [68-69]                              |
| 7620 | ACE inhibitor | 1 | GD | [97-98]                              |
| 7622 | ACE inhibitor | 4 | EG | [17-18], [33-34], [87-88], [130-131] |
| 7623 | ACE inhibitor | 1 | EA | [65-66]                              |
| 7625 | ACE inhibitor | 2 | PG | [24-25], [45-46]                     |
| 7680 | ACE inhibitor | 1 | QK | [63-64]                              |
| 7692 | ACE inhibitor | 1 | KF | [153-154]                            |
| 7698 | ACE inhibitor | 1 | NK | [152-153]                            |
| 7741 | ACE inhibitor | 2 | RR | [125-126], [143-144]                 |
| 7743 | ACE inhibitor | 1 | KA | [36-37]                              |
| 7829 | ACE inhibitor | 2 | VE | [83-84], [116-117]                   |
| 7830 | ACE inhibitor | 1 | TE | [120-121]                            |

|      |                                                  |    |     |                                                                                                                                 |
|------|--------------------------------------------------|----|-----|---------------------------------------------------------------------------------------------------------------------------------|
| 7838 | ACE inhibitor                                    | 1  | EW  | [89-90]                                                                                                                         |
| 7840 | ACE inhibitor                                    | 6  | EK  | [35-36], [60-61], [71-72], [80-81], [110-111], [122-123]                                                                        |
| 7841 | ACE inhibitor                                    | 5  | KE  | [54-55], [61-62], [64-65], [76-77], [132-133]                                                                                   |
| 8382 | ACE inhibitor                                    | 1  | RYQ | [126-128]                                                                                                                       |
| 9039 | ACE inhibitor                                    | 1  | IFL | [3-5]                                                                                                                           |
| 9173 | ACE inhibitor                                    | 2  | RG  | [29-30], [91-92]                                                                                                                |
| 3285 | antithrombotic                                   | 2  | PG  | [24-25], [45-46]                                                                                                                |
| 3354 | antithrombotic                                   | 2  | DEE | [57-59], [78-80]                                                                                                                |
| 3351 | stimulating vasoactive substance release         | 4  | EEE | [58-60], [84-86], [85-87], [133-135]                                                                                            |
| 8325 | Glucose uptake stimulating                       | 1  | II  | [2-3]                                                                                                                           |
| 8329 | stimulating vasoactive substance release         | 13 | EE  | [55-56], [58-59], [59-60], [79-80], [84-85], [85-86], [86-87], [100-101], [109-110], [117-118], [121-122], [133-134], [134-135] |
| 8330 | stimulating vasoactive substance release         | 2  | SE  | [19-20], [138-139]                                                                                                              |
| 2890 | neuropeptide                                     | 2  | GQ  | [25-26], [46-47]                                                                                                                |
| 2754 | regulating the stomach mucosal membrane activity | 2  | PG  | [24-25], [45-46]                                                                                                                |
| 7866 | antioxidative                                    | 1  | AY  | [11-12]                                                                                                                         |
| 8058 | antioxidative                                    | 1  | RHG | [95-97]                                                                                                                         |

|      |                                           |   |     |                             |
|------|-------------------------------------------|---|-----|-----------------------------|
| 8065 | antioxidative                             | 1 | RHR | [106-108]                   |
| 8134 | antioxidative                             | 1 | KD  | [123-124]                   |
| 8474 | antioxidative                             | 1 | RYQ | [126-128]                   |
| 9363 | antioxidative                             | 1 | NEN | [160-162]                   |
| 8249 | CaNPDE <sup>3</sup> inhibitor             | 1 | KF  | [153-154]                   |
| 8248 | Renin inhibitor                           | 1 | KF  | [153-154]                   |
| 9433 | Renin inhibitor                           | 1 | YA  | [12-13]                     |
| 4006 | activating ubiquitin-mediated proteolysis | 1 | LA  | [5-6]                       |
| 3172 | dipeptidyl peptidase IV inhibitor         | 1 | VA  | [10-11]                     |
| 3174 | dipeptidyl peptidase IV inhibitor         | 1 | KA  | [36-37]                     |
| 3175 | dipeptidyl peptidase IV inhibitor         | 1 | LA  | [5-6]                       |
| 3181 | dipeptidyl peptidase IV inhibitor         | 1 | VP  | [23-24]                     |
| 3183 | dipeptidyl peptidase IV inhibitor         | 1 | VV  | [82-83]                     |
| 8505 | dipeptidyl peptidase IV inhibitor         | 1 | SP  | [44-45]                     |
| 8518 | dipeptidyl peptidase IV inhibitor         | 1 | RP  | [49-50]                     |
| 8529 | dipeptidyl peptidase IV inhibitor         | 1 | EP  | [20-21]                     |
| 8530 | dipeptidyl peptidase IV inhibitor         | 1 | NP  | [145-146]                   |
| 8555 | dipeptidyl peptidase IV inhibitor         | 3 | FL  | [4-5], [147-148], [154-155] |

|      |                                   |   |     |                                                          |
|------|-----------------------------------|---|-----|----------------------------------------------------------|
| 8558 | dipeptidyl peptidase IV inhibitor | 6 | EK  | [35-36], [60-61], [71-72], [80-81], [110-111], [122-123] |
| 8600 | dipeptidyl peptidase IV inhibitor | 1 | WRG | [90-92]                                                  |
| 8611 | dipeptidyl peptidase IV inhibitor | 1 | WRP | [48-50]                                                  |
| 8675 | dipeptidyl peptidase IV inhibitor | 2 | WR  | [48-49], [90-91]                                         |
| 8691 | dipeptidyl peptidase IV inhibitor | 1 | WE  | [73-74]                                                  |
| 8758 | dipeptidyl peptidase IV inhibitor | 1 | AE  | [37-38]                                                  |
| 8759 | dipeptidyl peptidase IV inhibitor | 1 | AF  | [6-7]                                                    |
| 8765 | dipeptidyl peptidase IV inhibitor | 1 | AY  | [11-12]                                                  |
| 8767 | dipeptidyl peptidase IV inhibitor | 1 | DP  | [98-99]                                                  |
| 8769 | dipeptidyl peptidase IV inhibitor | 1 | DR  | [124-125]                                                |
| 8770 | dipeptidyl peptidase IV inhibitor | 4 | EG  | [17-18], [33-34], [87-88], [130-131]                     |
| 8773 | dipeptidyl peptidase IV inhibitor | 1 | ES  | [139-140]                                                |
| 8774 | dipeptidyl peptidase IV inhibitor | 1 | ET  | [135-136]                                                |
| 8776 | dipeptidyl peptidase IV inhibitor | 1 | EW  | [89-90]                                                  |
| 8781 | dipeptidyl peptidase IV inhibitor | 2 | GE  | [34-35], [88-89]                                         |
| 8785 | dipeptidyl peptidase IV inhibitor | 1 | GI  | [1-2]                                                    |
| 8790 | dipeptidyl peptidase IV inhibitor | 1 | HE  | [129-130]                                                |
| 8794 | dipeptidyl peptidase IV inhibitor | 1 | HR  | [107-108]                                                |

|      |                                   |   |    |                                               |
|------|-----------------------------------|---|----|-----------------------------------------------|
| 8801 | dipeptidyl peptidase IV inhibitor | 1 | II | [2-3]                                         |
| 8808 | dipeptidyl peptidase IV inhibitor | 5 | KE | [54-55], [61-62], [64-65], [76-77], [132-133] |
| 8809 | dipeptidyl peptidase IV inhibitor | 1 | KF | [153-154]                                     |
| 8814 | dipeptidyl peptidase IV inhibitor | 1 | KR | [113-114]                                     |
| 8815 | dipeptidyl peptidase IV inhibitor | 1 | KS | [150-151]                                     |
| 8816 | dipeptidyl peptidase IV inhibitor | 1 | KT | [111-112]                                     |
| 8817 | dipeptidyl peptidase IV inhibitor | 1 | KV | [81-82]                                       |
| 8818 | dipeptidyl peptidase IV inhibitor | 1 | KW | [72-73]                                       |
| 8824 | dipeptidyl peptidase IV inhibitor | 1 | LT | [155-156]                                     |
| 8840 | dipeptidyl peptidase IV inhibitor | 1 | ND | [14-15]                                       |
| 8841 | dipeptidyl peptidase IV inhibitor | 1 | NE | [160-161]                                     |
| 8854 | dipeptidyl peptidase IV inhibitor | 1 | PF | [146-147]                                     |
| 8855 | dipeptidyl peptidase IV inhibitor | 2 | PG | [24-25], [45-46]                              |
| 8862 | dipeptidyl peptidase IV inhibitor | 1 | PS | [50-51]                                       |
| 8869 | dipeptidyl peptidase IV inhibitor | 2 | QE | [32-33], [141-142]                            |
| 8872 | dipeptidyl peptidase IV inhibitor | 1 | QH | [128-129]                                     |
| 8877 | dipeptidyl peptidase IV inhibitor | 3 | QS | [39-40], [43-44], [67-68]                     |
| 8878 | dipeptidyl peptidase IV inhibitor | 1 | QT | [119-120]                                     |

|      |                                    |   |    |                      |
|------|------------------------------------|---|----|----------------------|
| 8879 | dipeptidyl peptidase IV inhibitor  | 1 | QV | [115-116]            |
| 8880 | dipeptidyl peptidase IV inhibitor  | 1 | QW | [47-48]              |
| 8882 | dipeptidyl peptidase IV inhibitor  | 2 | RG | [29-30], [91-92]     |
| 8883 | dipeptidyl peptidase IV inhibitor  | 2 | RH | [95-96], [106-107]   |
| 8885 | dipeptidyl peptidase IV inhibitor  | 1 | RK | [75-76]              |
| 8888 | dipeptidyl peptidase IV inhibitor  | 1 | RN | [144-145]            |
| 8889 | dipeptidyl peptidase IV inhibitor  | 2 | RR | [125-126], [143-144] |
| 8892 | dipeptidyl peptidase IV inhibitor  | 1 | SH | [51-52]              |
| 8899 | dipeptidyl peptidase IV inhibitor  | 1 | TE | [120-121]            |
| 8904 | dipeptidyl peptidase IV inhibitor  | 1 | TK | [112-113]            |
| 8905 | dipeptidyl peptidase IV inhibitor  | 1 | TL | [156-157]            |
| 8910 | dipeptidyl peptidase IV inhibitor  | 1 | TS | [136-137]            |
| 8916 | dipeptidyl peptidase IV inhibitor  | 2 | VE | [83-84], [116-117]   |
| 8932 | dipeptidyl peptidase IV inhibitor  | 1 | YA | [12-13]              |
| 8943 | dipeptidyl peptidase IV inhibitor  | 1 | YQ | [127-128]            |
| 9485 | dipeptidyl peptidase III inhibitor | 2 | RR | [125-126], [143-144] |
| 9487 | dipeptidyl peptidase III inhibitor | 2 | GE | [34-35], [88-89]     |
| 9489 | dipeptidyl peptidase III inhibitor | 1 | PR | [21-22]              |

|      |                                    |   |    |                             |
|------|------------------------------------|---|----|-----------------------------|
| 9491 | dipeptidyl peptidase III inhibitor | 1 | RV | [22-23]                     |
| 9499 | dipeptidyl peptidase III inhibitor | 1 | LA | [5-6]                       |
| 9502 | dipeptidyl peptidase III inhibitor | 3 | FL | [4-5], [147-148], [154-155] |
| 9504 | dipeptidyl peptidase III inhibitor | 1 | PE | [99-100]                    |
| 9505 | dipeptidyl peptidase III inhibitor | 1 | PF | [146-147]                   |
| 9511 | dipeptidyl peptidase III inhibitor | 1 | KA | [36-37]                     |

---

<sup>1</sup> Potential bioactivities of peptide sequences found in convicilin were retrieved from the bioactive peptide library of the BIOPEP database (<http://www.uwm.edu.pl/biochemia/index.php/en/biopep>)

<sup>2</sup> Amino acids are coded according to their one letter abbreviation: A = alanine; C = cystine, D = aspartic acid, E = glutamic acid, F = phenylalanine, G = glycine, H = histidine, I = isoleucine, K = lysine, L = leucine, M = methionine, N = asparagine, P = proline, Q = glutamine, R = arginine, S = serine, T = threonine, V = valine, W = tryptophan, Y = tyrosine

<sup>3</sup> CaNPDE = calmodulin-dependent cyclic nucleotide phosphodiesterase
